# Supplementary material for: Efficient Approximation of the Labeled Multi‐Bernoulli Filter for Online Multitarget Tracking
Source: Hindawi journal article supplement (doi:10.1155/2017/8742897), 2017-01-01
Supplement: f1 [file 8742897.f1.zip]

Archive with 7 entries (7 files):
- sim2trial2.avi
- sim2trial6.avi
- sim1trial998.avi
- sim1trial5.avi
- sim1trial54.avi
- sim1trial555.avi
- sim2trial669.avi
